# Supplementary material
Source: MDPI journal article supplement (https://www.mdpi.com/2073-4441/11/2/360)
Supplement: s1 [file s1]

**Supplemental Material for “Statistical and Numerical Assessments of Groundwater Resource Subject to Excessive Pumping: Case Study in Southwest Taiwan”  
by Shih et al. (2019)**

**1. Land Subsidence Survey**

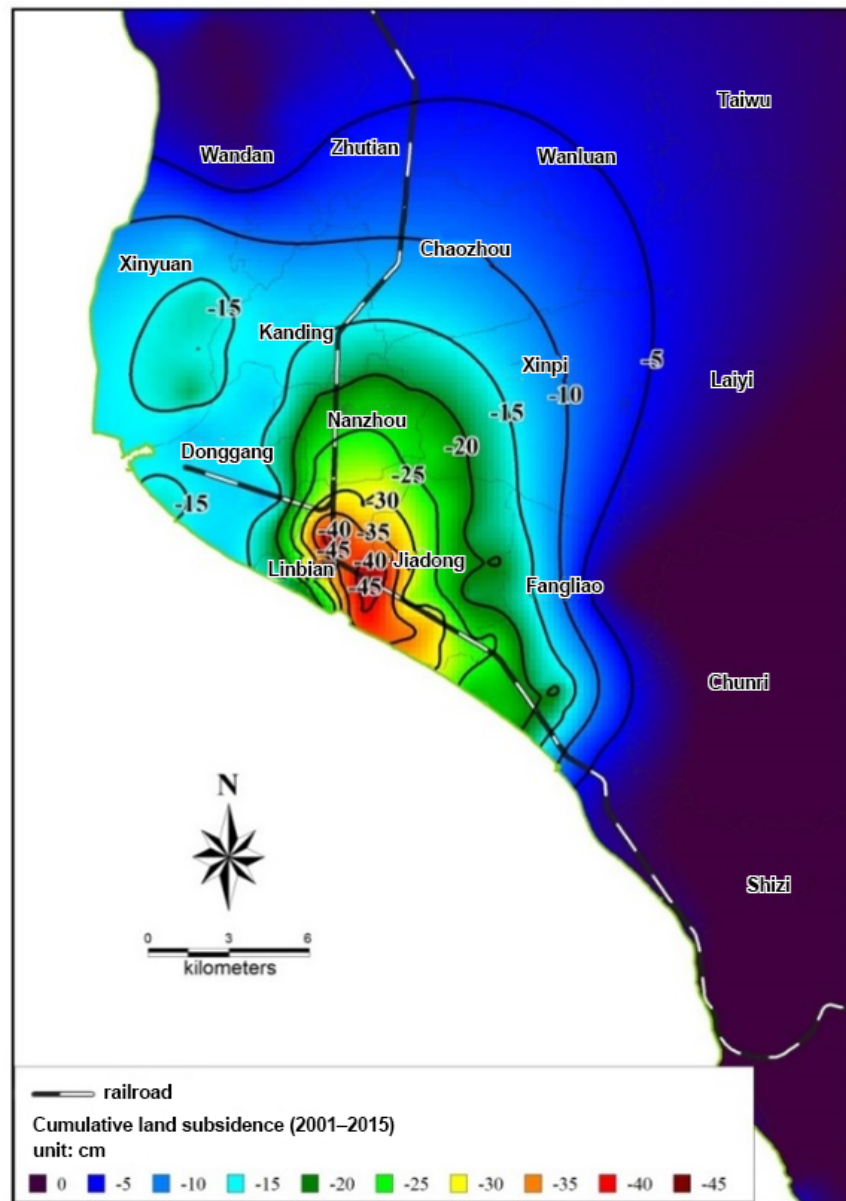

**Fig. S1.** Map of cumulative land subsidence from 2001 to 2015 (source: Land-Subsidence Prevention and Reclamation Corp, NCKU & WRA, Ministry of Economic Affairs).

## 2. Calibration Results of WASH123D from August 5<sup>th</sup> to September 5<sup>th</sup> of 2009

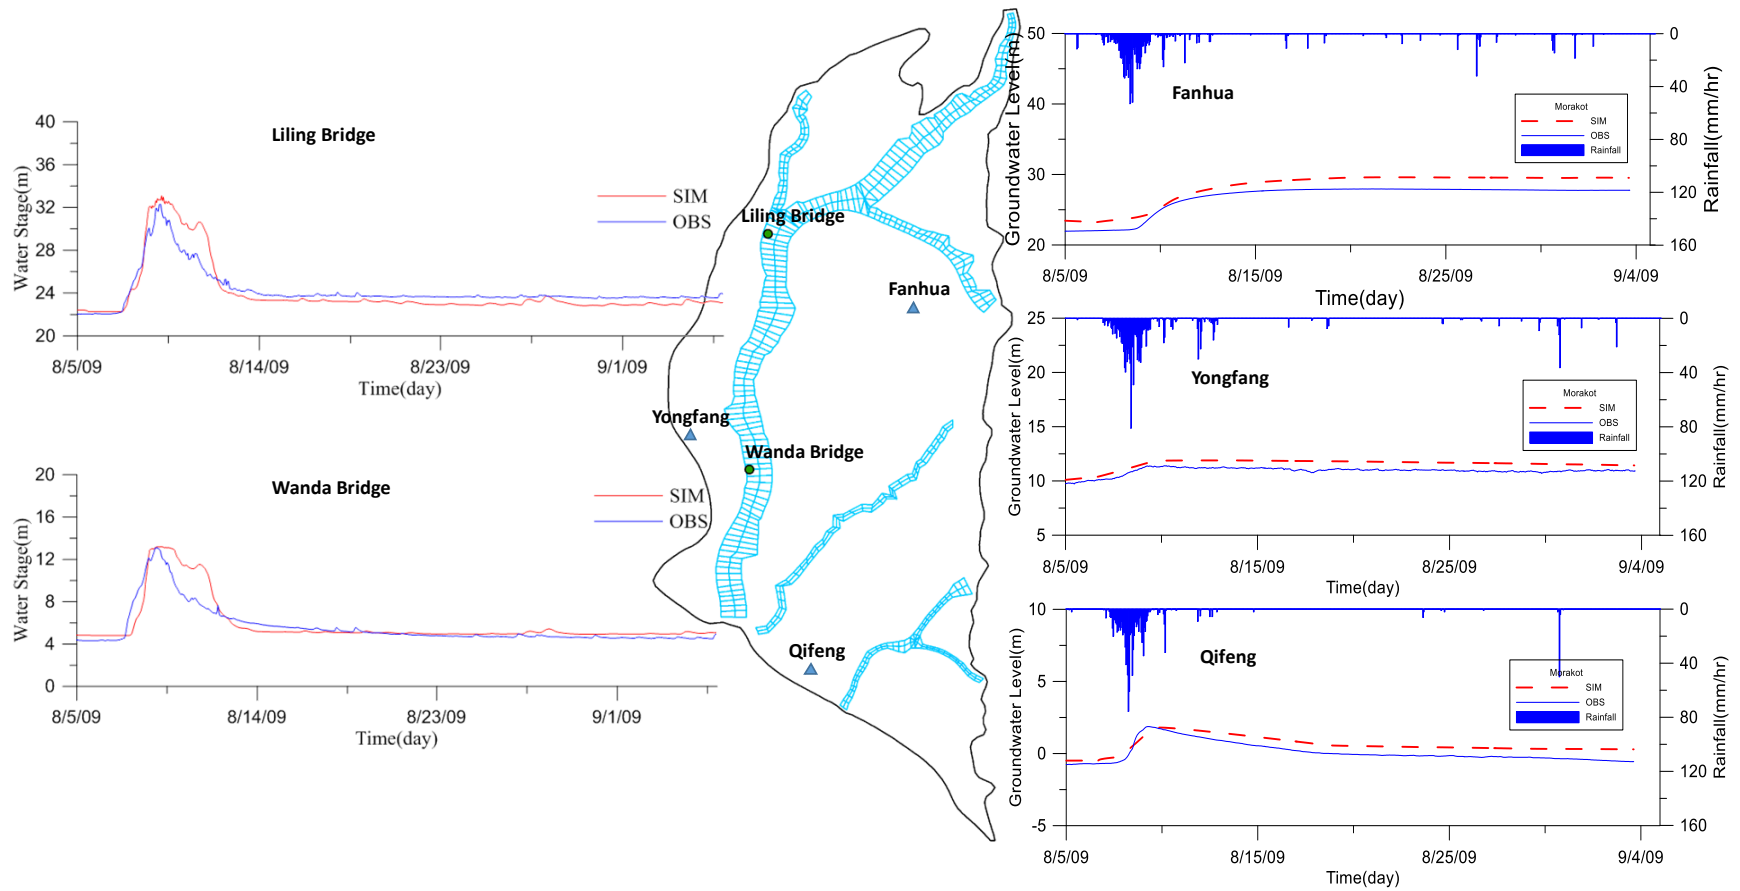

**Fig. S2.** Calibration results of river stages in the Gaoping River (left) and groundwater levels (right) from August 5<sup>th</sup> to September 5<sup>th</sup> of 2009.
